# Supplementary material
Source: PubMed Central journal article supplement (PMC1472436)
Supplement: pnas_0601161103_8.pdf [file pnas_0601161103_8.pdf]

**Table 4. List of PCR primers**

| Locus      | Primer name | Primer sequence (5' > 3') |
|------------|-------------|---------------------------|
| MAR region | F           | TGCCATATTTTTGAGAATGTTGA   |
|            | R           | TCCGTGGAATCTACTTCAAATG    |
|            | F2          | ATTTTTGAGAATGTTGACACTTC   |
|            | R2          | CATTCTTAATAAAGTCCGTGGA    |
|            | Fint        | TGCAGTGGTGGTTCAAGAAG      |
|            | Rint        | TTGTAAGGGGATCAGCTTCG      |
| SET exon 2 | Fint        | GATGATTCCTGTCCGAATTGA     |
|            | R           | TAGCCAACCACTGTCTTCCA      |
|            | Rev6        | GCAAGCAGGGTTTMGGTATG      |
